# Supplementary material
Source: Royal Society of Chemistry journal article supplement (doi:10.1039/d6nj01045h)
Supplement: d6nj01045h1.pdf [file d6nj01045h1.pdf]

1  
2  
3  
4  
5  
6  
7  
8  
9  
10  
11  
12  
13  
14  
15  
16  
17  
18  
19  
20  
21  
22  
23  
24  
25  
26

## Supplementary material

### **Hydroxyl-functionalized covalent organic framework enables high-affinity adsorption of myricetin**

Shuangyu Wei, Xin Peng, Lu Bai, Wei Wei, Feiyue Zhang, Chaoqun You\* and Fei Wang\*

Jiangsu Co-Innovation Centre of Efficient Processing and Utilization of Forest Resources, Jiangsu Key Lab for the Chemistry and Utilization of Agro-Forest Biomass, College of Chemical Engineering, Nanjing Forestry University, Nanjing 210037, PR China

Corresponding authors:

Fei Wang, E-mail address: hgwf@njfu.edu.cn

Chaoqun You, E-mail address: chemyoucq@njfu.edu.cn

Number of pages: 17

Tables: 7

Figures: 12

## 27 **Contents**

### 28 **1. Experimental section**

29 1.1 Materials

30 1.2 Instruments

31 1.3 Synthesis of DHBD-COF.

32 1.4 Synthesis of DHA-COF.

33 1.5 Synthesis of PA-COF.

### 34 **2. Results and Discussions**

35 Fig. S1 SEM images of (a) DHBD-COF, (b) DHA-COF and (c) PA-COF.

36 Fig. S2 FT-IR spectra of (a) DHBD-COF, (b) DHA-COF and (c) PA-COF.

37 Fig. S3. Solid state  $^{13}\text{C}$  NMR of (a) DHBD-COF, (b) DHA-COF, and PA-COF.

38 Fig. S4 TGA curve of DHBD-COF, DHA-COF and PA-COF.

39 Fig. S5 PXRD patterns of (a) DHBD-COF, (b) DHA-CPF, (c) PA-COF-AA and AB  
40 stacked simulated.

Fig. 2-9 PXRD patterns of (a) DHBD-COF, (b) DHA-COF, and (c) PA-COF after  
treatment with HCl (9 M), NaOH (9 M), and DMF.

41 Fig. S7  $\text{N}_2$  adsorption-desorption isotherms at 77 K for (a) DHBD-COF, (b) DHA-COF  
42 and (c) PA-COF.

43 Fig. S8 BET plot of (a) DHBD, (b) DHA-COF and (c) PA-COF calculated from  $\text{N}_2$   
44 adsorption isotherm at 77 K.

45 Fig. S9 Pore size distribution for (a) DHBD-COF, (b) DHA-COF and (c) PA-COF.

46 Fig. S10 The front view (a) and top view (b) of the DHBD-COF after adsorbing  
47 myricetin were simulated by Materials Studio.

48 Fig. S11 Structure of myricetin, quercetin, luteolin, kaempferol and rutin. gray:  
49 carbon red: oxygen White: hydrogen.

50 Fig. S12 Comparison of the adsorption performance of five flavonoids by (a) DHBD-  
51 COF, (b) DHA-COF and (c) PA-COF. Regeneration performance of (a) DHBD-COF,  
52 (b) DHA-COF and (c) PA-COF for myricetin.

53 Table S1-3 Unit cell parameters and fractional atomic coordinates

54 Table S4 Kinetic models parameters for adsorption of myricetin on COFs.

55 Table S5 Isotherm models parameters for adsorption of myricetin on COFs

56 Table S6 Thermodynamic parameters of myricetin adsorption on COFs.

57 Table S7 Comparison of the equilibrium time and  $q_m$  of myricetin onto COFs with

58 some other materials

### 59 **3. References**

60

# 61 **1. Experimental section**

62

## 63 **1.1 Materials**

64

65 All available starting compounds and solvents, unless otherwise noted, were obtained from J&K  
66 scientific LTD. myricetin ( $\geq 97\%$ ), rutin ( $\geq 98\%$ ) were purchased from Shanghai Macklin  
67 Biochemical Co. quercetin ( $\geq 97\%$ ), kaempferol (95 %) were purchased from Shanghai Yuanye  
68 Bio-Technology Co. luteolin ( $> 97\%$ ) were purchased from Shanghai Bide Pharmaceutical  
69 Technology Co.

70

## 71 **1.2 Instruments**

72

73 Solid- state  $^{13}\text{C}$  NMR spectra were recorded on an AVIII 500 MHz solid-state NMR spectrometer.  
74 X-ray photoelectron spectroscopy (XPS) measurements were conducted on a R3000/VUV5K/ MX-  
75 650 XPS/UPS system, the take-off angle of the photoelectron was fixed at  $90^\circ$  with respect to the  
76 sample plane. Fourier transform infrared (FT-IR) spectra (KBr pellets) were obtained using a  
77 SHIMADZU IRAffinity<sup>-1</sup> spectrophotometer. Thermogravimetric analysis (TGA) was recorded on  
78 a SHIMADZU DTG-60 thermal analyzer under  $\text{N}_2$ . The operational range of the instrument was  
79 from  $50\text{ }^\circ\text{C}$  to  $800\text{ }^\circ\text{C}$  at a heating rate of  $5\text{ }^\circ\text{C min}^{-1}$  with  $\text{N}_2$  flow rate of  $30\text{ mL min}^{-1}$ . Powder X-  
80 ray diffraction (PXRD) data were collected on a PANalytical B.V. Empyrean diffractometer using  
81  $\text{Cu K}\alpha$  radiation ( $\lambda = 1.5418\text{ \AA}$ ) over the  $2\theta$  range of  $2.0\text{-}40.0^\circ$  with a step size of  $0.02^\circ$  and a  
82 counting time of 2 s per step. The sorption isotherm for  $\text{N}_2$  was measured by using a Quantachrome  
83 Autosorb-IQ analyzer with ultra-high-purity gas (99.999% purity). To assess pore size distributions  
84 for DHBD-COF, DHA-COF and PA-COF, nonlocal density functional theory (NLDFT) was  
85 adopted to analyze the  $\text{N}_2$  isotherm on the basis of the model of  $\text{N}_2@77\text{ K}$  on carbon with slit pores  
86 and the method of non-negative regularization. For scanning electron microscopy (SEM) image,  
87 JEOL JSM-6700 scanning electron microscope was applied. Transmission electron microscopy  
88 (TEM) image was obtained on JEM-2100 transmission electron microscopy. UV—vis transmittance  
89 and absorption spectra were recorded on a UV-2700 Spectrophotometer (Shimadzu).

90 **1.3 Synthesis of DHBD-COF**

91

92 DHBD (0.06 mmol, 14.17 mg) and TAPT (0.04 mmol, 14.53 mg) were weighed and added into  
93 a Pyrex tube. Subsequently, 1 mL of mesitylene and 0.1 mL of acetic acid (6 M) were introduced  
94 as the solvent system. After thorough mixing, the tube was quickly frozen in a liquid nitrogen bath,  
95 evacuated, and flame-sealed. The sealed tube was then heated at 120 °C for 3 days. After the  
96 reaction, the solid product was collected by filtration and washed thoroughly with acetone. Finally,  
97 the obtained material was dried under vacuum at 60 °C to afford DHBD-COF.

98

99 **1.4 Synthesis of DHA-COF**

100

101 DHA (0.066 mmol, 10.96 mg) and TAPT (0.044 mmol, 15.59 mg) were weighed and added into  
102 a Pyrex tube. Subsequently, 0.5 mL of mesitylene, 0.5 mL of dioxane, and 0.1 mL of acetic acid (3  
103 M) were introduced as the solvent system. After thorough mixing, the tube was quickly frozen in a  
104 liquid nitrogen bath, evacuated, and flame-sealed. The sealed tube was then heated at 120 °C for 3  
105 days. After the reaction, the solid product was collected by filtration and washed thoroughly with  
106 acetone. Finally, the obtained material was dried under vacuum at 60 °C to afford DHA-COF.

107

108 **1.5 Synthesis of PA-COF**

109

110 PA (0.066 mmol, 8.85 mg) and TAPT (0.044 mmol, 15.59 mg) were weighed and added into a  
111 Pyrex tube. Subsequently, 0.5 mL of mesitylene, 0.5 mL of dioxane, and 0.1 mL of acetic acid (6  
112 M) were introduced as the solvent system. After thorough mixing, the tube was quickly frozen in a  
113 liquid nitrogen bath, evacuated, and flame-sealed. The sealed tube was then heated at 80 °C for 3  
114 days. After the reaction, the solid product was collected by filtration and washed thoroughly with  
115 acetone. Finally, the obtained material was dried under vacuum at 60 °C to afford PA-COF.

116

117

118

119

## 120 1.6 Adsorption experiments

121

122 The adsorption properties of the COFs we synthesized were evaluated through a series of  
123 adsorption tests. Standard flavonoid compounds of myricetin, quercetin, luteolin, kaempferol, and  
124 rutin (Fig. S1) were dissolved in methanol to prepare stock solutions. The stock solutions were then  
125 diluted to prepare working solutions with different concentrations. To investigate the adsorption  
126 kinetics, 4 mg of COF was placed in a 10 mL centrifuge tube containing 10 mL of the flavonoid  
127 working solution (100 mg/L). The mixtures were shaken in a constant-temperature shaker at 150  
128 rpm for 0-120 minutes. Adsorption isotherm experiments were conducted at three temperatures—  
129 298 K, 308 K, and 318 K. Flavonoid working solutions with concentrations ranging from 25 to 250  
130 mg/L were prepared. 10 mL of flavonoid solutions with varying concentrations were placed into 10  
131 mL centrifuge tubes, after which 4 mg of the COF adsorbent was introduced. The mixtures were  
132 placed in a thermostatic shaker for 3 hours to ensure adequate adsorption. The supernatant was  
133 filtered using a 0.22  $\mu\text{m}$  membrane, and the resulting solution was analyzed via UV-vis  
134 spectrophotometry. The adsorption capacity was calculated using Eq. (1) :

135

$$136 \quad q_t = (C_0 - C_t)V/m \quad (1)$$

137

138

139 Where  $q_t$  (mg/g) is the adsorption capacity,  $C_0$  (mg/L) is the initial concentration of flavonoids,  $C_t$   
140 (mg/L) is the concentration of flavonoid compounds in the supernatant after adsorption,  $V$  (L) is  
141 the volume of the flavonoids solution,  $m$  (mg) is the mass of the adsorbent.

142

## 143 1.7 Adsorption kinetics and isotherms

144

145 In order to study the adsorption kinetics, pseudo-first-order models (Eq. (2)) and pseudo-second-  
146 order models (Eq. (3)) were applied to fit and analyze the experimental data. These models are  
147 commonly used to describe the adsorption of a solute from a liquid solution onto a solid adsorbent.

148

$$149 \quad \ln(q_e - q_t) = \ln q_e - k_1 t \quad (2)$$

150

151  $t/q_t = 1/k_2q_e^2 + t/q_e$  (3)

152

153 where  $q_e$  is the equilibrium adsorption capacity,  $q_t$  is the adsorption capacity at time  $t$ .  
154  $k_1$  (1/min) and  $k_2$  (g/mg/min)) are the adsorption rate parameters of pseudo-first-order  
155 and pseudo-second-order kinetic models, respectively.

156

157 To investigate the adsorption isotherms, the Langmuir (Eq. (5)) and Freundlich (Eq. (6)) models  
158 were employed, according to the following equations:

159

$$q_e = Q_m K_L C_e / (1 + K_L C_e) \quad (4)$$

160

161

162

163  $\ln q_e = (1/n) \ln C_e + \ln K_F$  (5)

164

165

166 Where  $q_e$  and  $q_m$  represent the equilibrium adsorption capacity and the maximum adsorption  
167 capacity, respectively.  $C_e$  (mg/L) is the equilibrium concentration.  $K_L$  (L/mg) and  $K_F$   
168 (mg/g(L/mg)<sup>1/n</sup>) are constants of the Langmuir and Freundlich isotherm models, respectively,  
169 related to the adsorption energy and representing the adsorption capacity, while  $1/n$  is the Freundlich  
170 isotherm constant.

171

172

173 **2. Results and Discussions**

174

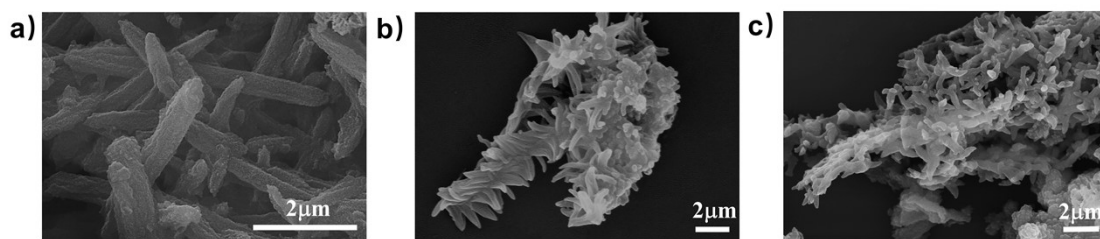

175 **Fig. S1** SEM images of (a) DHBD-COF, (b) DHA-COF and (c) PA-COF.

176

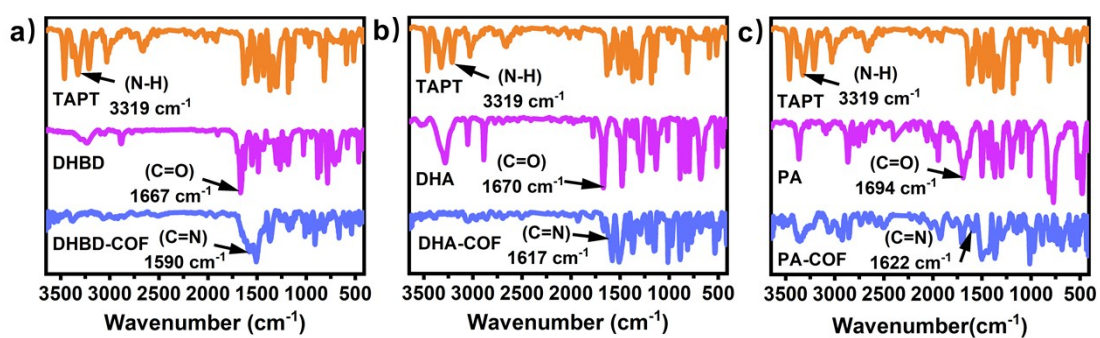

177 **Fig. S2** FT-IR spectra of (a) DHBD-COF, (b) DHA-COF and (c) PA-COF.

178

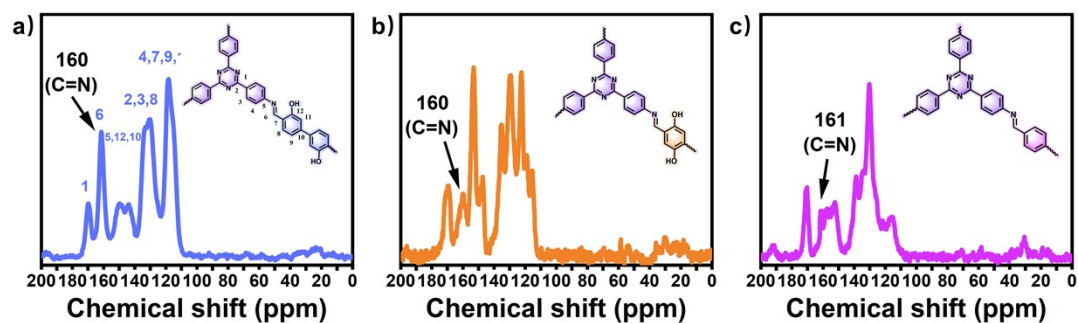

179 **Fig. S3** Solid state <sup>13</sup>C NMR of (a) DHBD-COF, (b) DHA-COF, and (c) PA-COF.

180

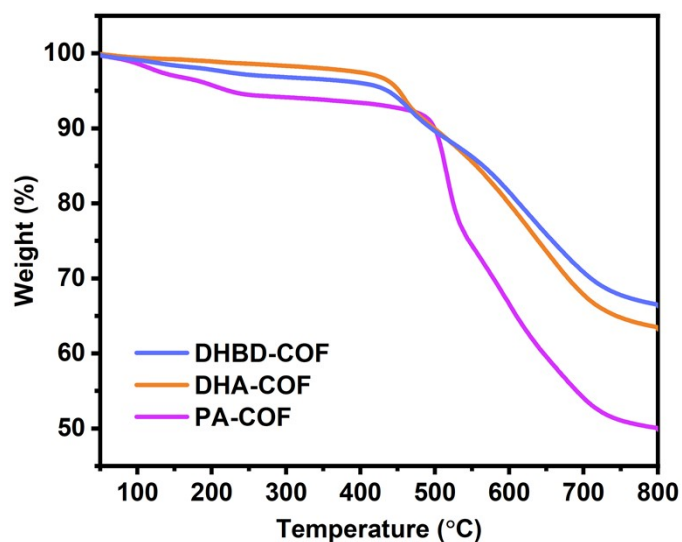

181 Fig. S4 TGA curve of DHBD-COF, DHA-COF and PA-COF.

182

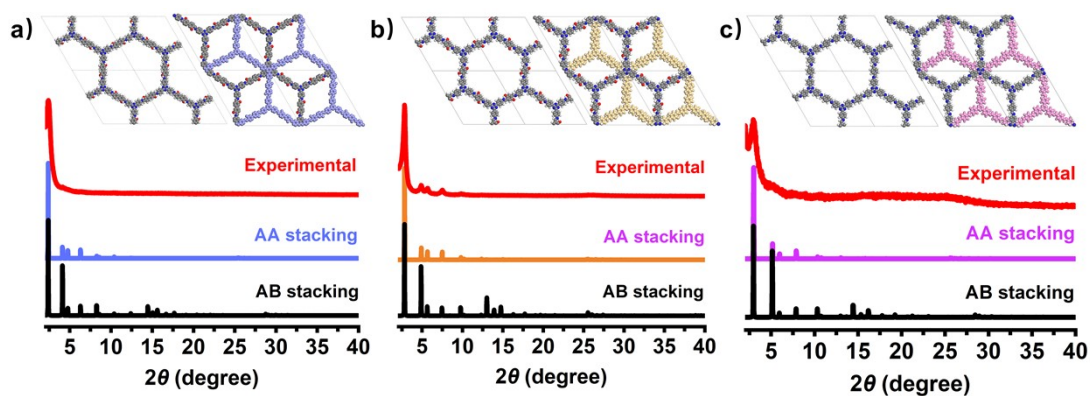

183 Fig. S5 PXRD patterns of (a) DHBD-COF, (b) DHA-COF, (c) PA-COF-AA and AB stacked

184 simulated.

185

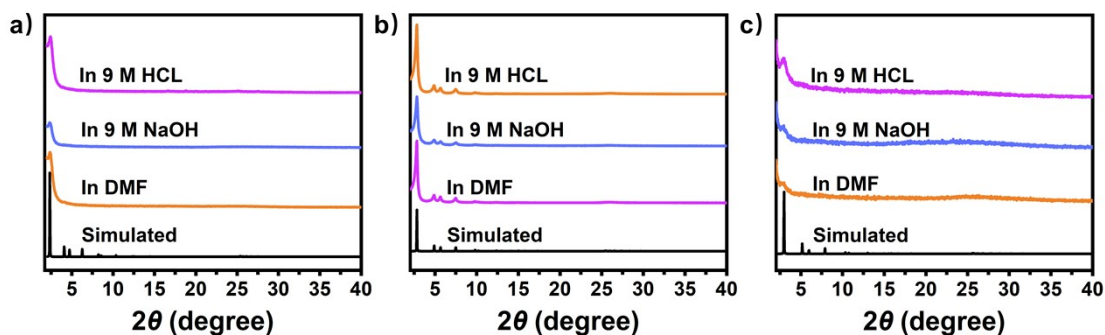

186 Fig. S6 PXRD patterns of (a) DHBD-COF, (b) DHA-COF, and (c) PA-COF after treatment with  
187 HCl (9 M), NaOH (9 M), and DMF.

186

187

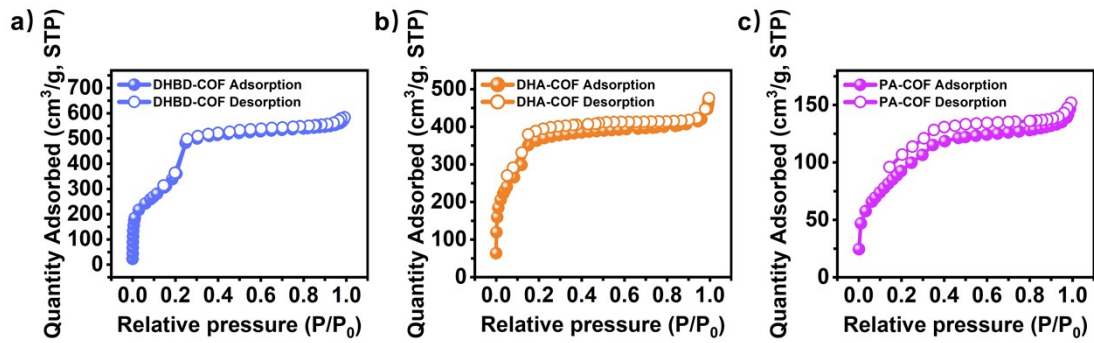189 **Fig. S7**  $N_2$  adsorption-desorption isotherms at 77 K for (a) DHBD-COF, (b) DHA-COF and (c)

190 PA-COF.

191

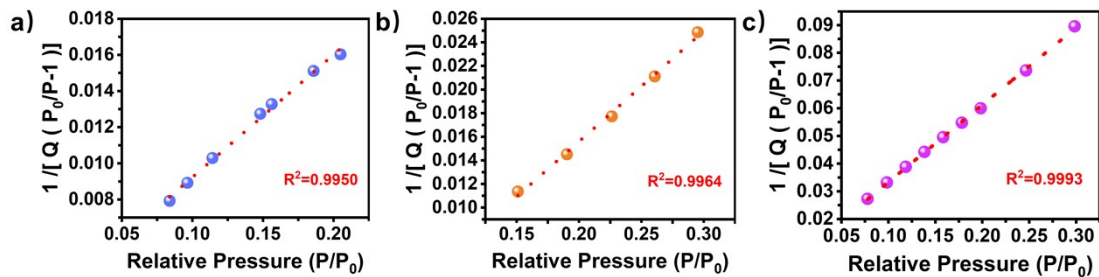192 **Fig. S8** BET plot of (a) DHBD, (b) DHA-COF and (c) PA-COF calculated from  $N_2$  adsorption

193 isotherm at 77 K.

194

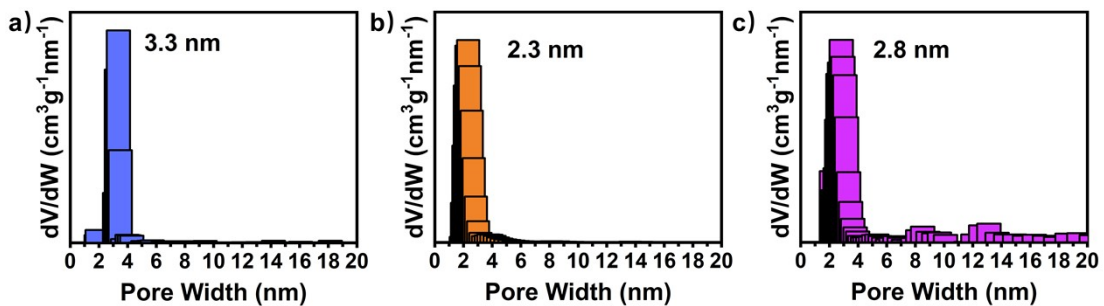195 **Fig. S9** Pore size distribution for (a) DHBD-COF, (b) DHA-COF and (c) PA-COF.

196

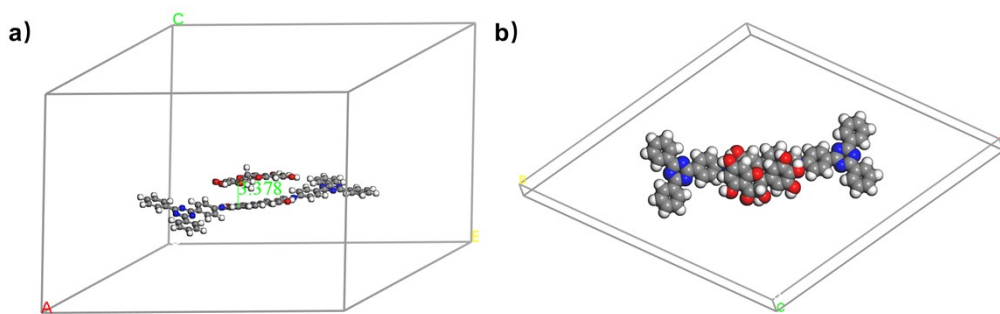

197 **Fig. S10** The front view (a) and top view (b) of the DHBD-COF after adsorbing  
 198 myricetin were simulated by Materials Studio.

199

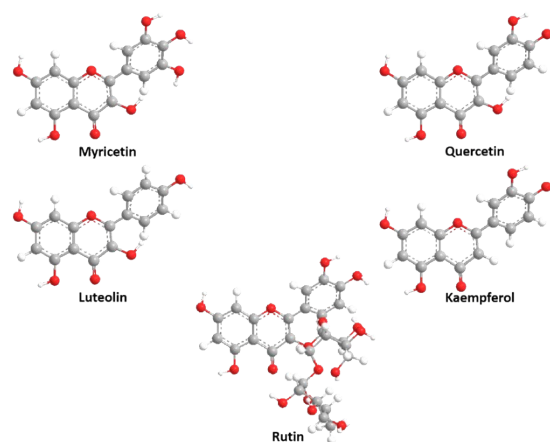

200 **Fig. S11** Structure of myricetin, quercetin, luteolin, kaempferol and rutin. gray: carbon red: oxygen  
 201 White: hydrogen.

202

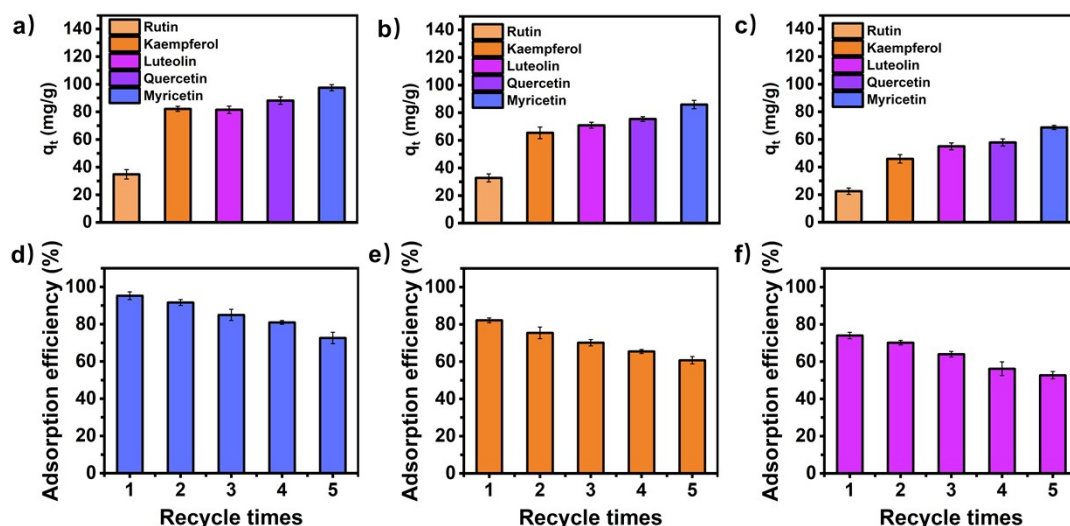

203 **Fig. S12** Comparison of the adsorption performance of five flavonoids by (a) DHBD-COF, (b)  
 204 DHA-COF and (c) PA-COF. Regeneration performance of (d) DHBD-COF, (e) DHA-COF and  
 205 (f) PA-COF for myricetin.

206 **Table S1** Unit cell parameters and fractional atomic coordinates for DHBD-COF calculated based  
 207 on the AA stacking *hcb* net.

|                    |                                                                                     |         |         |
|--------------------|-------------------------------------------------------------------------------------|---------|---------|
| Space group        | P6                                                                                  |         |         |
| Measured unit cell | a = b = 43.2437 Å, c = 3.5083 Å, $\alpha = \beta = 90^\circ$ , $\gamma = 120^\circ$ |         |         |
| Pawley refinement  | $R_p = 3.58\%$ , $R_{wp} = 5.12\%$                                                  |         |         |
| atoms              | x                                                                                   | y       | z       |
| N1                 | -0.63174                                                                            | 0.68659 | 4.01158 |
| C2                 | -0.64027                                                                            | 0.59915 | 4.01158 |
| C3                 | -0.61973                                                                            | 0.5837  | 4.01158 |
| C4                 | -0.58351                                                                            | 0.60422 | 4.01158 |
| C5                 | -0.56824                                                                            | 0.64023 | 4.01158 |
| C6                 | -0.58881                                                                            | 0.65568 | 4.01158 |
| C7                 | -0.62497                                                                            | 0.63527 | 4.01158 |
| C8                 | -0.57363                                                                            | 0.55613 | 4.01158 |
| N9                 | -0.56171                                                                            | 0.58921 | 4.01158 |
| C10                | -0.56667                                                                            | 0.50504 | 4.01158 |
| C11                | -0.54678                                                                            | 0.48889 | 4.01158 |
| C12                | -0.51056                                                                            | 0.50856 | 4.01158 |
| C13                | -0.49469                                                                            | 0.54475 | 4.01158 |
| C14                | -0.51442                                                                            | 0.56111 | 4.01158 |
| C15                | -0.55086                                                                            | 0.54109 | 4.01158 |
| C16                | -0.29822                                                                            | 0.35336 | 4.01158 |
| O17                | -0.49771                                                                            | 0.59647 | 4.01158 |
| H18                | -0.66966                                                                            | 0.58238 | 4.01158 |
| H19                | -0.63234                                                                            | 0.55431 | 4.01158 |
| H20                | -0.53887                                                                            | 0.65715 | 4.01158 |
| H21                | -0.5762                                                                             | 0.68507 | 4.01158 |
| H22                | -0.60291                                                                            | 0.53849 | 4.01158 |
| H23                | -0.59611                                                                            | 0.48879 | 4.01158 |
| H24                | -0.55997                                                                            | 0.45946 | 4.01158 |
| H25                | -0.46527                                                                            | 0.56126 | 4.01158 |
| H26                | -0.51478                                                                            | 0.60525 | 4.13862 |

209 **Table S2** Unit cell parameters and fractional atomic coordinates for DHA-COF calculated based on  
 210 the AA stacking *hcb* net.

|                    |                                                                                     |         |         |
|--------------------|-------------------------------------------------------------------------------------|---------|---------|
| Space group        | P6                                                                                  |         |         |
| Measured unit cell | a = b = 36.2103 Å, c = 3.4040 Å, $\alpha = \beta = 90^\circ$ , $\gamma = 120^\circ$ |         |         |
| Pawley refinement  | $R_p = 4.29\%$ , $R_{wp} = 5.71\%$                                                  |         |         |
| atoms              | x                                                                                   | y       | z       |
| C1                 | 0.35249                                                                             | 0.70858 | 1.47067 |
| N2                 | 0.37492                                                                             | 0.68925 | 1.47067 |
| C3                 | 0.36148                                                                             | 0.58351 | 1.47065 |
| C4                 | 0.38477                                                                             | 0.56384 | 1.47066 |
| C5                 | 0.4281                                                                              | 0.58711 | 1.47068 |
| C6                 | 0.44729                                                                             | 0.63009 | 1.4707  |
| C7                 | 0.42404                                                                             | 0.64977 | 1.47069 |
| C8                 | 0.38082                                                                             | 0.6267  | 1.47067 |
| C9                 | 0.44225                                                                             | 0.52994 | 1.47072 |
| N10                | 0.45392                                                                             | 0.56889 | 1.47069 |
| C11                | 0.45762                                                                             | 0.47304 | 1.47072 |
| C12                | 0.48449                                                                             | 0.45717 | 1.47072 |
| C13                | 0.52743                                                                             | 0.48441 | 1.47072 |
| O14                | 0.46864                                                                             | 0.41458 | 1.47072 |
| H15                | 0.32825                                                                             | 0.56478 | 1.47063 |
| H16                | 0.36842                                                                             | 0.53064 | 1.47064 |
| H17                | 0.48055                                                                             | 0.64845 | 1.47071 |
| H18                | 0.44001                                                                             | 0.68308 | 1.47071 |
| H19                | 0.40999                                                                             | 0.50691 | 1.47074 |
| H20                | 0.42471                                                                             | 0.45193 | 1.47072 |
| H21                | 0.43747                                                                             | 0.39787 | 1.47072 |

211

212 **Table S3** Unit cell parameters and fractional atomic coordinates for PA-COF calculated based on  
 213 the AA stacking *hcb* net.

|                    |                                                                                                            |          |   |
|--------------------|------------------------------------------------------------------------------------------------------------|----------|---|
| Space group        | P6                                                                                                         |          |   |
| Measured unit cell | $a = b = 34.2 \text{ \AA}$ , $c = 3.4813 \text{ \AA}$ , $\alpha = \beta = 90^\circ$ , $\gamma = 120^\circ$ |          |   |
| Pawley refinement  | $R_p = 3.76\%$ , $R_{wp} = 5.20\%$                                                                         |          |   |
| atoms              | x                                                                                                          | y        | z |
| C1                 | -0.65288                                                                                                   | -0.42665 | 1 |
| C2                 | -0.63409                                                                                                   | -0.45105 | 1 |
| C3                 | -0.54295                                                                                                   | -0.51686 | 1 |
| C4                 | -0.64285                                                                                                   | -0.29135 | 1 |
| N5                 | -0.62499                                                                                                   | -0.3153  | 1 |
| C6                 | -0.59102                                                                                                   | -0.43274 | 1 |
| C7                 | -0.62864                                                                                                   | -0.38316 | 1 |
| C8                 | -0.53373                                                                                                   | -0.44542 | 1 |
| N9                 | -0.57324                                                                                                   | -0.45906 | 1 |
| C10                | -0.4831                                                                                                    | -0.52632 | 1 |
| C11                | -0.56658                                                                                                   | -0.38933 | 1 |
| C12                | -0.58523                                                                                                   | -0.36479 | 1 |
| C13                | -0.52611                                                                                                   | -0.54299 | 1 |
| H14                | -0.68634                                                                                                   | -0.44169 | 1 |
| H15                | -0.65295                                                                                                   | -0.48444 | 1 |
| H16                | -0.57625                                                                                                   | -0.53017 | 1 |
| H17                | -0.53319                                                                                                   | -0.37448 | 1 |
| H18                | -0.56577                                                                                                   | -0.33142 | 1 |
| H19                | -0.54658                                                                                                   | -0.57622 | 1 |

214

215 **Table S4** Kinetic models parameters for adsorption of myricetin on COFs.

|          | pseudo-first-order |                       |                        | pseudo-second-order |                       |                           |
|----------|--------------------|-----------------------|------------------------|---------------------|-----------------------|---------------------------|
|          | R <sup>2</sup>     | q <sub>e</sub> (mg/g) | k <sub>1</sub> (1/min) | R <sup>2</sup>      | q <sub>e</sub> (mg/g) | k <sub>2</sub> (g/mg/min) |
| DHBD-COF | 0.9490             | 93.98                 | 0.09                   | 0.9834              | 104.18                | 0.0011                    |
| DHA-COF  | 0.9814             | 83.92                 | 0.08                   | 0.9980              | 93.44                 | 0.0012                    |
| PA-COF   | 0.9714             | 65.92                 | 0.09                   | 0.9893              | 73.77                 | 0.0015                    |

216

217 **Table S5** Isotherm models parameters for adsorption of myricetin on COFs.

|              | T(K) | Langmuir                 |                                      |                | Freundlich                                     |         |                |
|--------------|------|--------------------------|--------------------------------------|----------------|------------------------------------------------|---------|----------------|
|              |      | K <sub>L</sub><br>(L/mg) | Q <sub>m</sub> (mg g <sup>-1</sup> ) | R <sup>2</sup> | K <sub>F</sub><br>(mg/g(L/mg) <sup>1/n</sup> ) | n       | R <sup>2</sup> |
| DHBD-<br>COF | 298  | 0.14                     | 117.99                               | 0.9966         | 41.08                                          | 4.70315 | 0.9832         |
|              | 308  | 0.095                    | 115.89                               | 0.9803         | 33.34                                          | 4.07386 | 0.9890         |
|              | 318  | 0.048                    | 109.59                               | 0.9899         | 20.51                                          | 3.15963 | 0.9808         |
| DHA-<br>COF  | 298  | 0.083                    | 100.32                               | 0.9678         | 29.92                                          | 4.3158  | 0.9286         |
|              | 308  | 0.058                    | 92.98                                | 0.9970         | 21.31                                          | 3.58924 | 0.9833         |
|              | 318  | 0.035                    | 86.81                                | 0.9954         | 13.78                                          | 2.97913 | 0.9650         |
| PA-<br>COF   | 298  | 0.080                    | 78.12                                | 0.9982         | 23.31                                          | 4.32684 | 0.9918         |
|              | 308  | 0.057                    | 69.99                                | 0.9994         | 17.13                                          | 3.80357 | 0.9901         |
|              | 318  | 0.029                    | 79.75                                | 0.9954         | 10.79                                          | 2.77222 | 0.9681         |

218

219 **Table S6** Thermodynamic parameters of myricetin adsorption on COFs.

|          | T (K) | ΔG (kJ/mol) | ΔH (kJ/mol) | ΔS (J/K·mol) |
|----------|-------|-------------|-------------|--------------|
| DHBD-COF | 298   | -26.51      |             |              |
|          | 308   | -26.41      | -29.26      | -9.22        |
|          | 318   | -25.49      |             |              |
| DHA-COF  | 298   | -25.22      |             |              |
|          | 308   | -25.17      | -26.94      | -5.76        |
|          | 318   | -24.65      |             |              |
| PA-COF   | 298   | -25.13      |             |              |
|          | 308   | -25.11      | -25.86      | -2.45        |
|          | 318   | -24.18      |             |              |

220

221 **Table S7** Comparison of the equilibrium time and  $q_m$  of myricetin on COFs with some other  
222 materials

| Materials                                            | $q_m$ (mg/g) | Ref. |
|------------------------------------------------------|--------------|------|
| DHBD-COF                                             | 117.99       | this |
| DHA-COF                                              | 100.32       | this |
| PA-COF                                               | 78.12        | this |
| Fe <sub>3</sub> O <sub>4</sub> -NH <sub>2</sub> @MIP | 19.96        | 34   |
| TSNP <sub>240</sub>                                  | 103.13       | 35   |
| TzDa-PBA                                             | 84.5         | 36   |
| MPM-MR                                               | 81.6         | 37   |
| COF-TD                                               | 124.6        | 38   |
